# Supplementary material for: Babies detect when the timing is right: Evidence from event-related potentials to a contingent mother-infant conversation
Source: PubMed Central journal article supplement — Dev Cogn Neurosci. 2021 Jan 21;48:100923. doi: 10.1016/j.dcn.2021.100923 (PMC7848774; doi:10.1016/j.dcn.2021.100923), 2021-01-21

**Supplemental Information A:**

An excerpt from the audio stimuli illustrating the nature of the conversational turns between the mother and infant speakers.

| Pre-trigger silence (sec) | Stimulus Speaker-Trigger Label | Vocal turn trial start point (sec) | Transcript of speech content                                                                                         |
|---------------------------|--------------------------------|------------------------------------|----------------------------------------------------------------------------------------------------------------------|
| 2.02                      | Mum-N                          | 00:00:51                           | You like zippers, don't you bubba?                                                                                   |
| 0.84                      | Infant-C                       | 00:00:54                           | [babble]                                                                                                             |
| 2.16                      | Mum-N                          | 00:00:57                           | Zipper. A zipper.                                                                                                    |
| 0.52                      | Infant-C                       | 00:01:02                           | [babble]                                                                                                             |
| 0.93                      | Mum-C                          | 00:01:08                           | You can't eat the zipper. Hmm. Not tasty, zipper.<br>Oh, maybe it feels good. Does it feel good on your toothy pegs? |
| 1.42                      | Infant-C                       | 00:01:23                           | [babble]                                                                                                             |
| 0.28                      | Mum-C                          | 00:01:26                           | How good?                                                                                                            |
| 1.40                      | Infant-C                       | 00:01:26                           | [babble]                                                                                                             |
| 4.06                      | Mum-N                          | 00:01:28                           | Are you?                                                                                                             |
| 0.58                      | Infant-C                       | 00:01:29                           | [babble]                                                                                                             |
| 0.64                      | Mum-C                          | 00:01:33                           | What you munching?                                                                                                   |
| 0.50                      | Infant-C                       | 00:01:35                           | [babble]                                                                                                             |
| 0.71                      | Mum-C                          | 00:01:42                           | Hey, bubba, what's in the bag?                                                                                       |
| 0.48                      | Infant-C                       | 00:01:47                           | [babble]                                                                                                             |
| 0.83                      | Mum-C                          | 00:01:57                           | Where's the bunny?                                                                                                   |

|      |          |          |                                                                                                                   |
|------|----------|----------|-------------------------------------------------------------------------------------------------------------------|
| 0.43 | Infant-C | 00:01:59 | [babble]                                                                                                          |
| 0.78 | Mum-C    | 00:02:01 | Hi.                                                                                                               |
| 1.12 | Infant-C | 00:02:07 | [babble]                                                                                                          |
| 1.27 | Mum-C    | 00:02:08 | Are you waving? Can you wave and say, hello? Hello. Where are you?                                                |
| 2.17 | Infant-N | 00:02:20 | [babble]                                                                                                          |
| 1.08 | Mum-C    | 00:02:23 | Peek-a-boo.                                                                                                       |
| 0.77 | Infant-C | 00:02:25 | [babble]                                                                                                          |
| 1.06 | Mum-C    | 00:02:30 | Where did bunny go?                                                                                               |
| 0.76 | Infant-C | 00:02:31 | [babble]                                                                                                          |
| 2.24 | Mum-N    | 00:02:32 | Peek-a-boo. Where's bunny, bubba? Peek-a-boo. Where's bunny?<br>Bunny gone? Peek-a-boo.                           |
| 0.32 | Infant-C | 00:03:01 | [babble]                                                                                                          |
| 1.16 | Mum-C    | 00:03:07 | Do you want to stand? You can stand up. What about a shark?                                                       |
| 4.08 | Infant-N | 00:03:17 | [babble]                                                                                                          |
| 2.23 | Mum-N    | 00:03:21 | Snap snap shark.                                                                                                  |
| 0.40 | Infant-C | 00:03:26 | [babble]                                                                                                          |
| 0.89 | Mum-C    | 00:03:30 | Does it snap snap your feet? Does it snap snap your fingies?                                                      |
| 0.43 | Infant-C | 00:03:38 | [babble]                                                                                                          |
| 1.04 | Mum-C    | 00:03:47 | Sharks have big teeth, to go, shnap, shnap, shnap, shnap, shnap.<br>Shnapetty shnap shnap. Shnapetty shnap shnap. |
| 0.39 | Infant-N | 00:03:59 | [babble]                                                                                                          |

---

**Supplemental Information B:**

A depiction of the location of the 10 the fronto-central electrodes as positioned on the scalp (electrodes E4, E5, E6, E11, E12, E13, E19, E20, E112, E118 in HCGSN) that were used to calculate the grand averaged ERP waveforms.

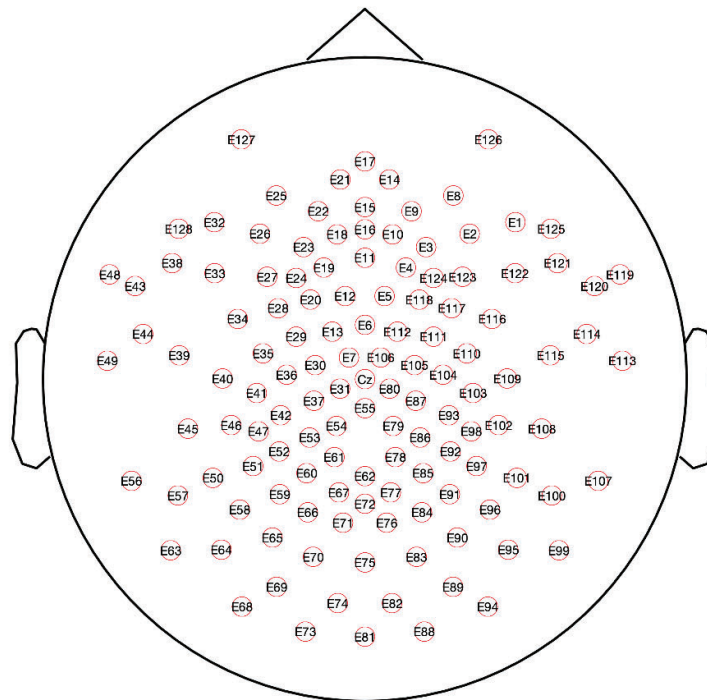

Supplement: mmc1.pdf [file mmc1.pdf]
