# Supplementary material for: Babies detect when the timing is right: Evidence from event-related potentials to a contingent mother-infant conversation
Source: PubMed Central journal article supplement — Dev Cogn Neurosci. 2021 Jan 21;48:100923. doi: 10.1016/j.dcn.2021.100923 (PMC7848774; doi:10.1016/j.dcn.2021.100923), 2021-01-21

### Supplemental Information C.

A depiction of the ERPs from all electrodes show a clear onset response to all stimuli in all groups

Adult group: Infant contingent (blue) vs Infant non-contingent (red)

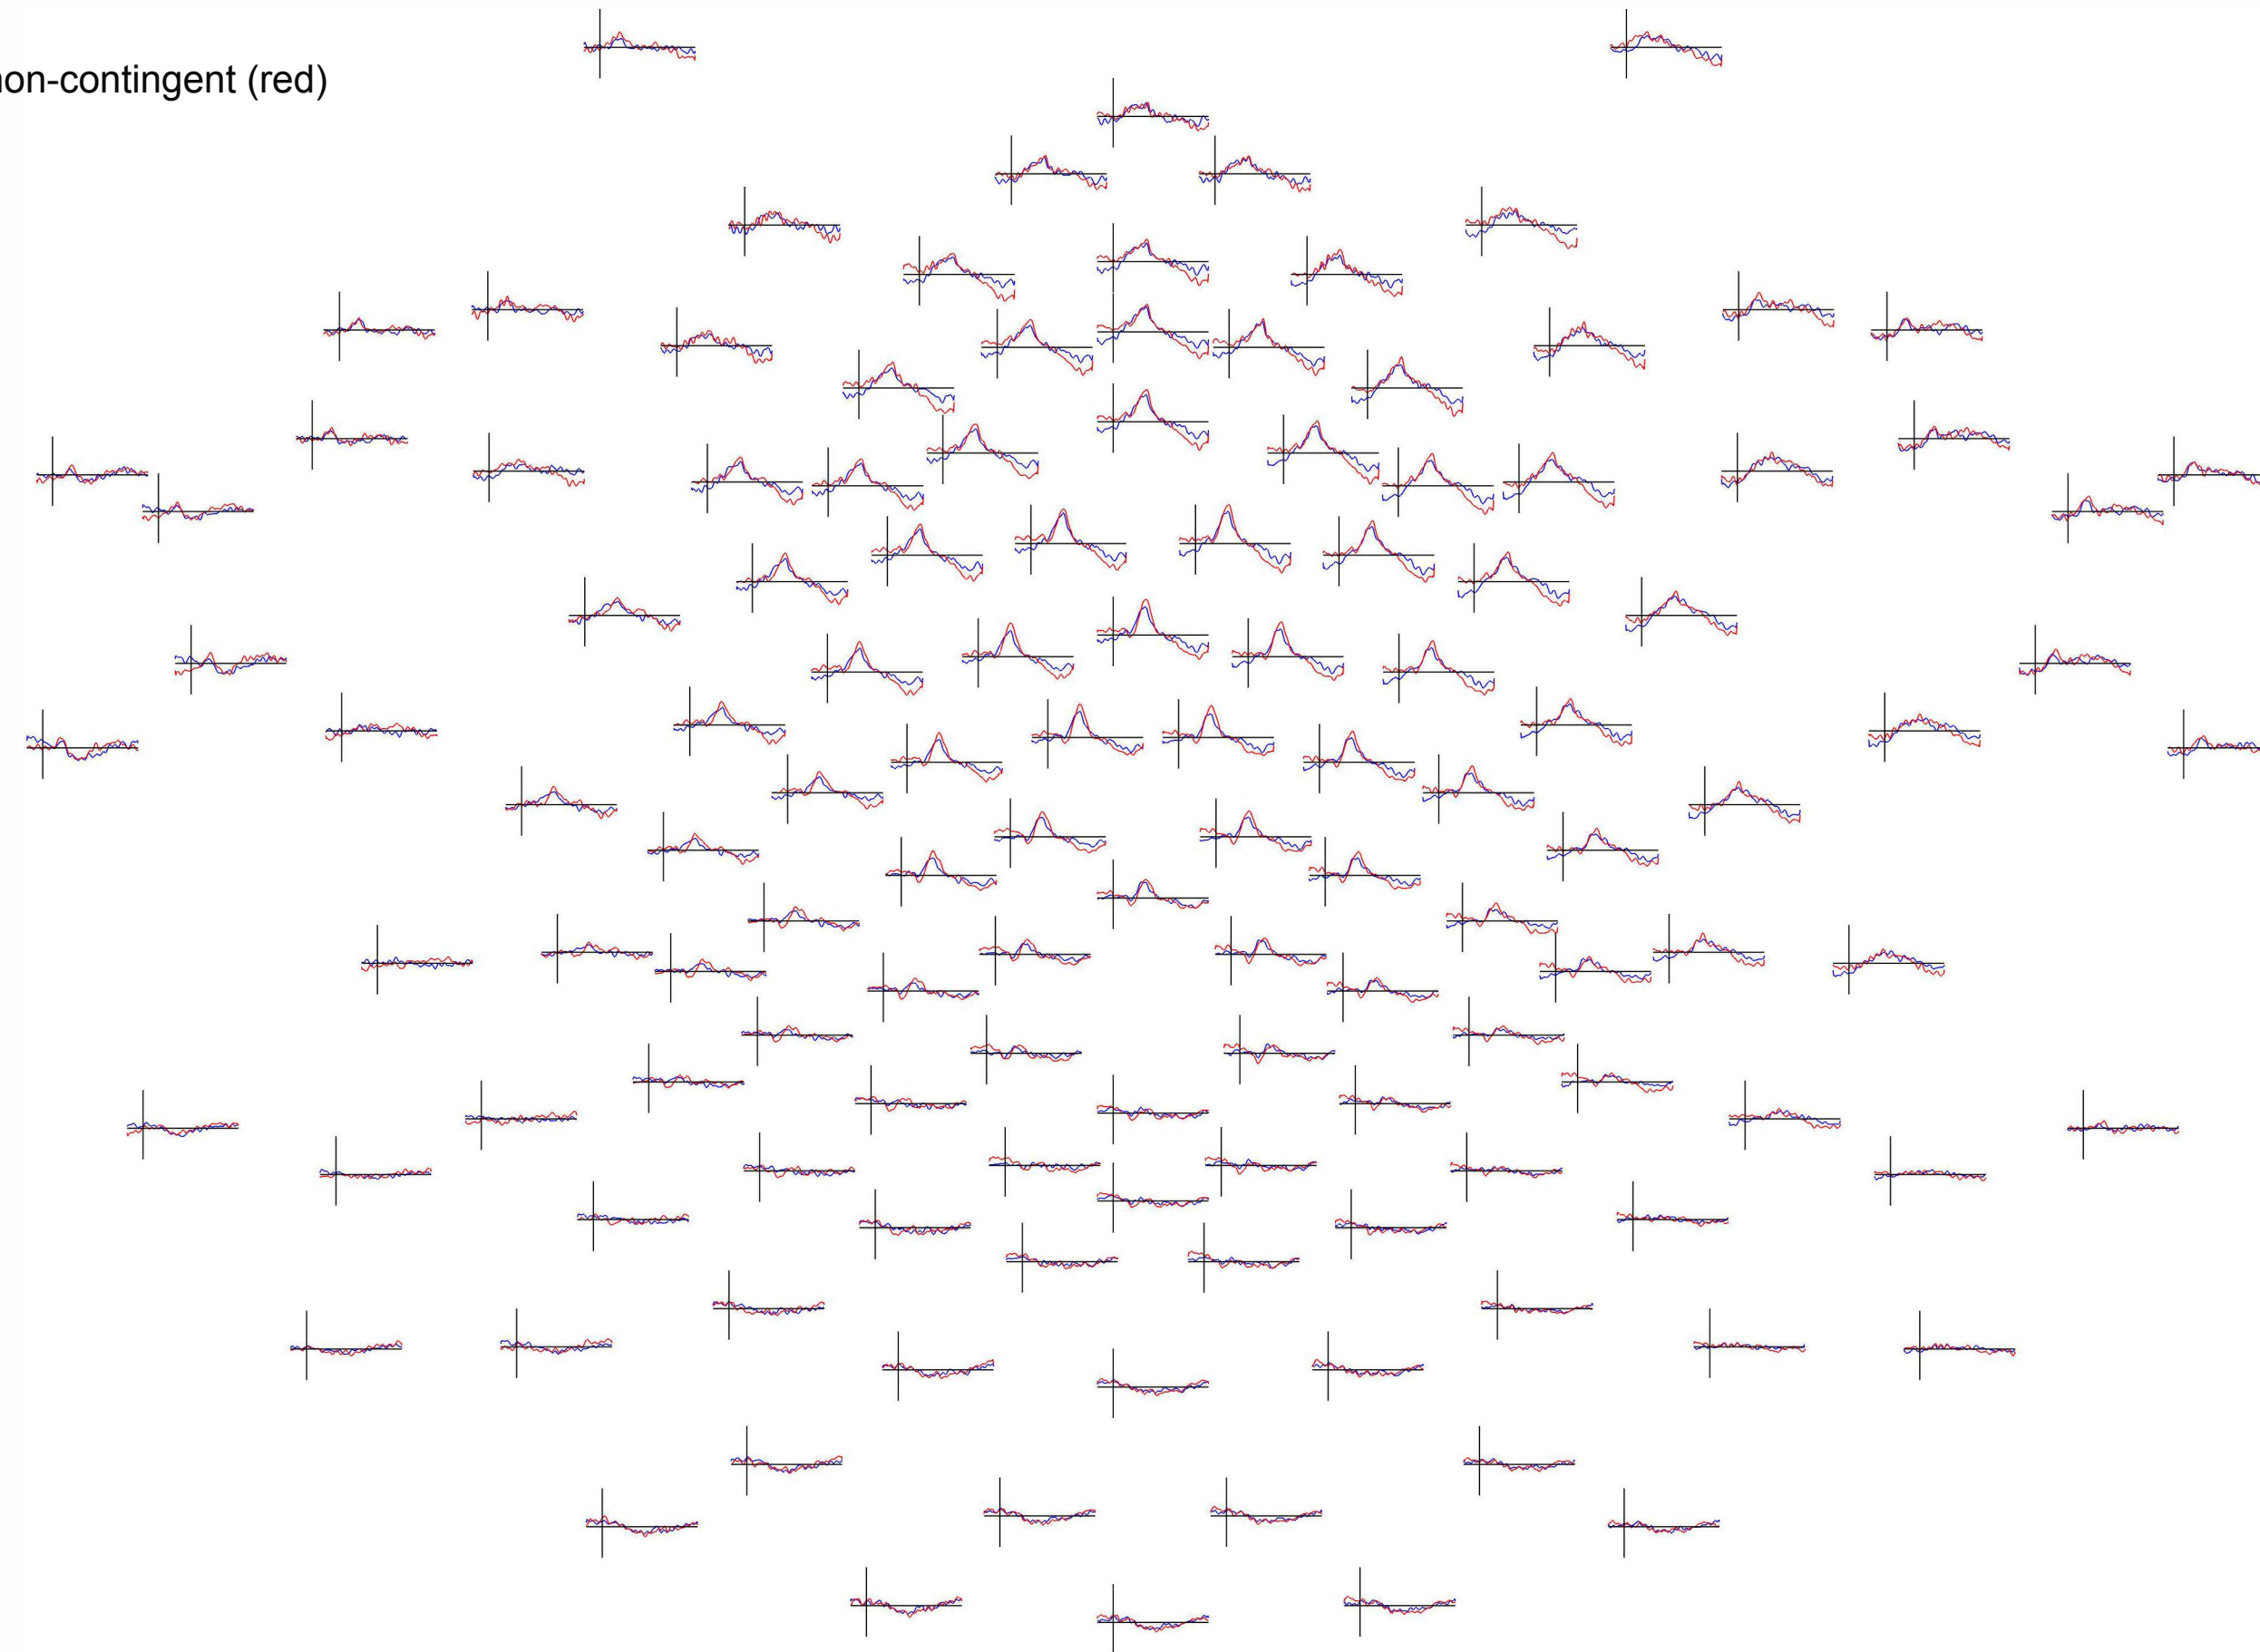

23-Dec-2020  
GA\_A\_InfCont\_MS\_ERP=b  
GA\_A\_InfNonCont\_MS\_ERP=r  
xlim=[-0.1 0.6]  
ylim=[-1.83 2.27]

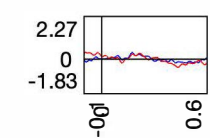

Adult group: Adult contingent (blue) vs Adult non-contingent (red)

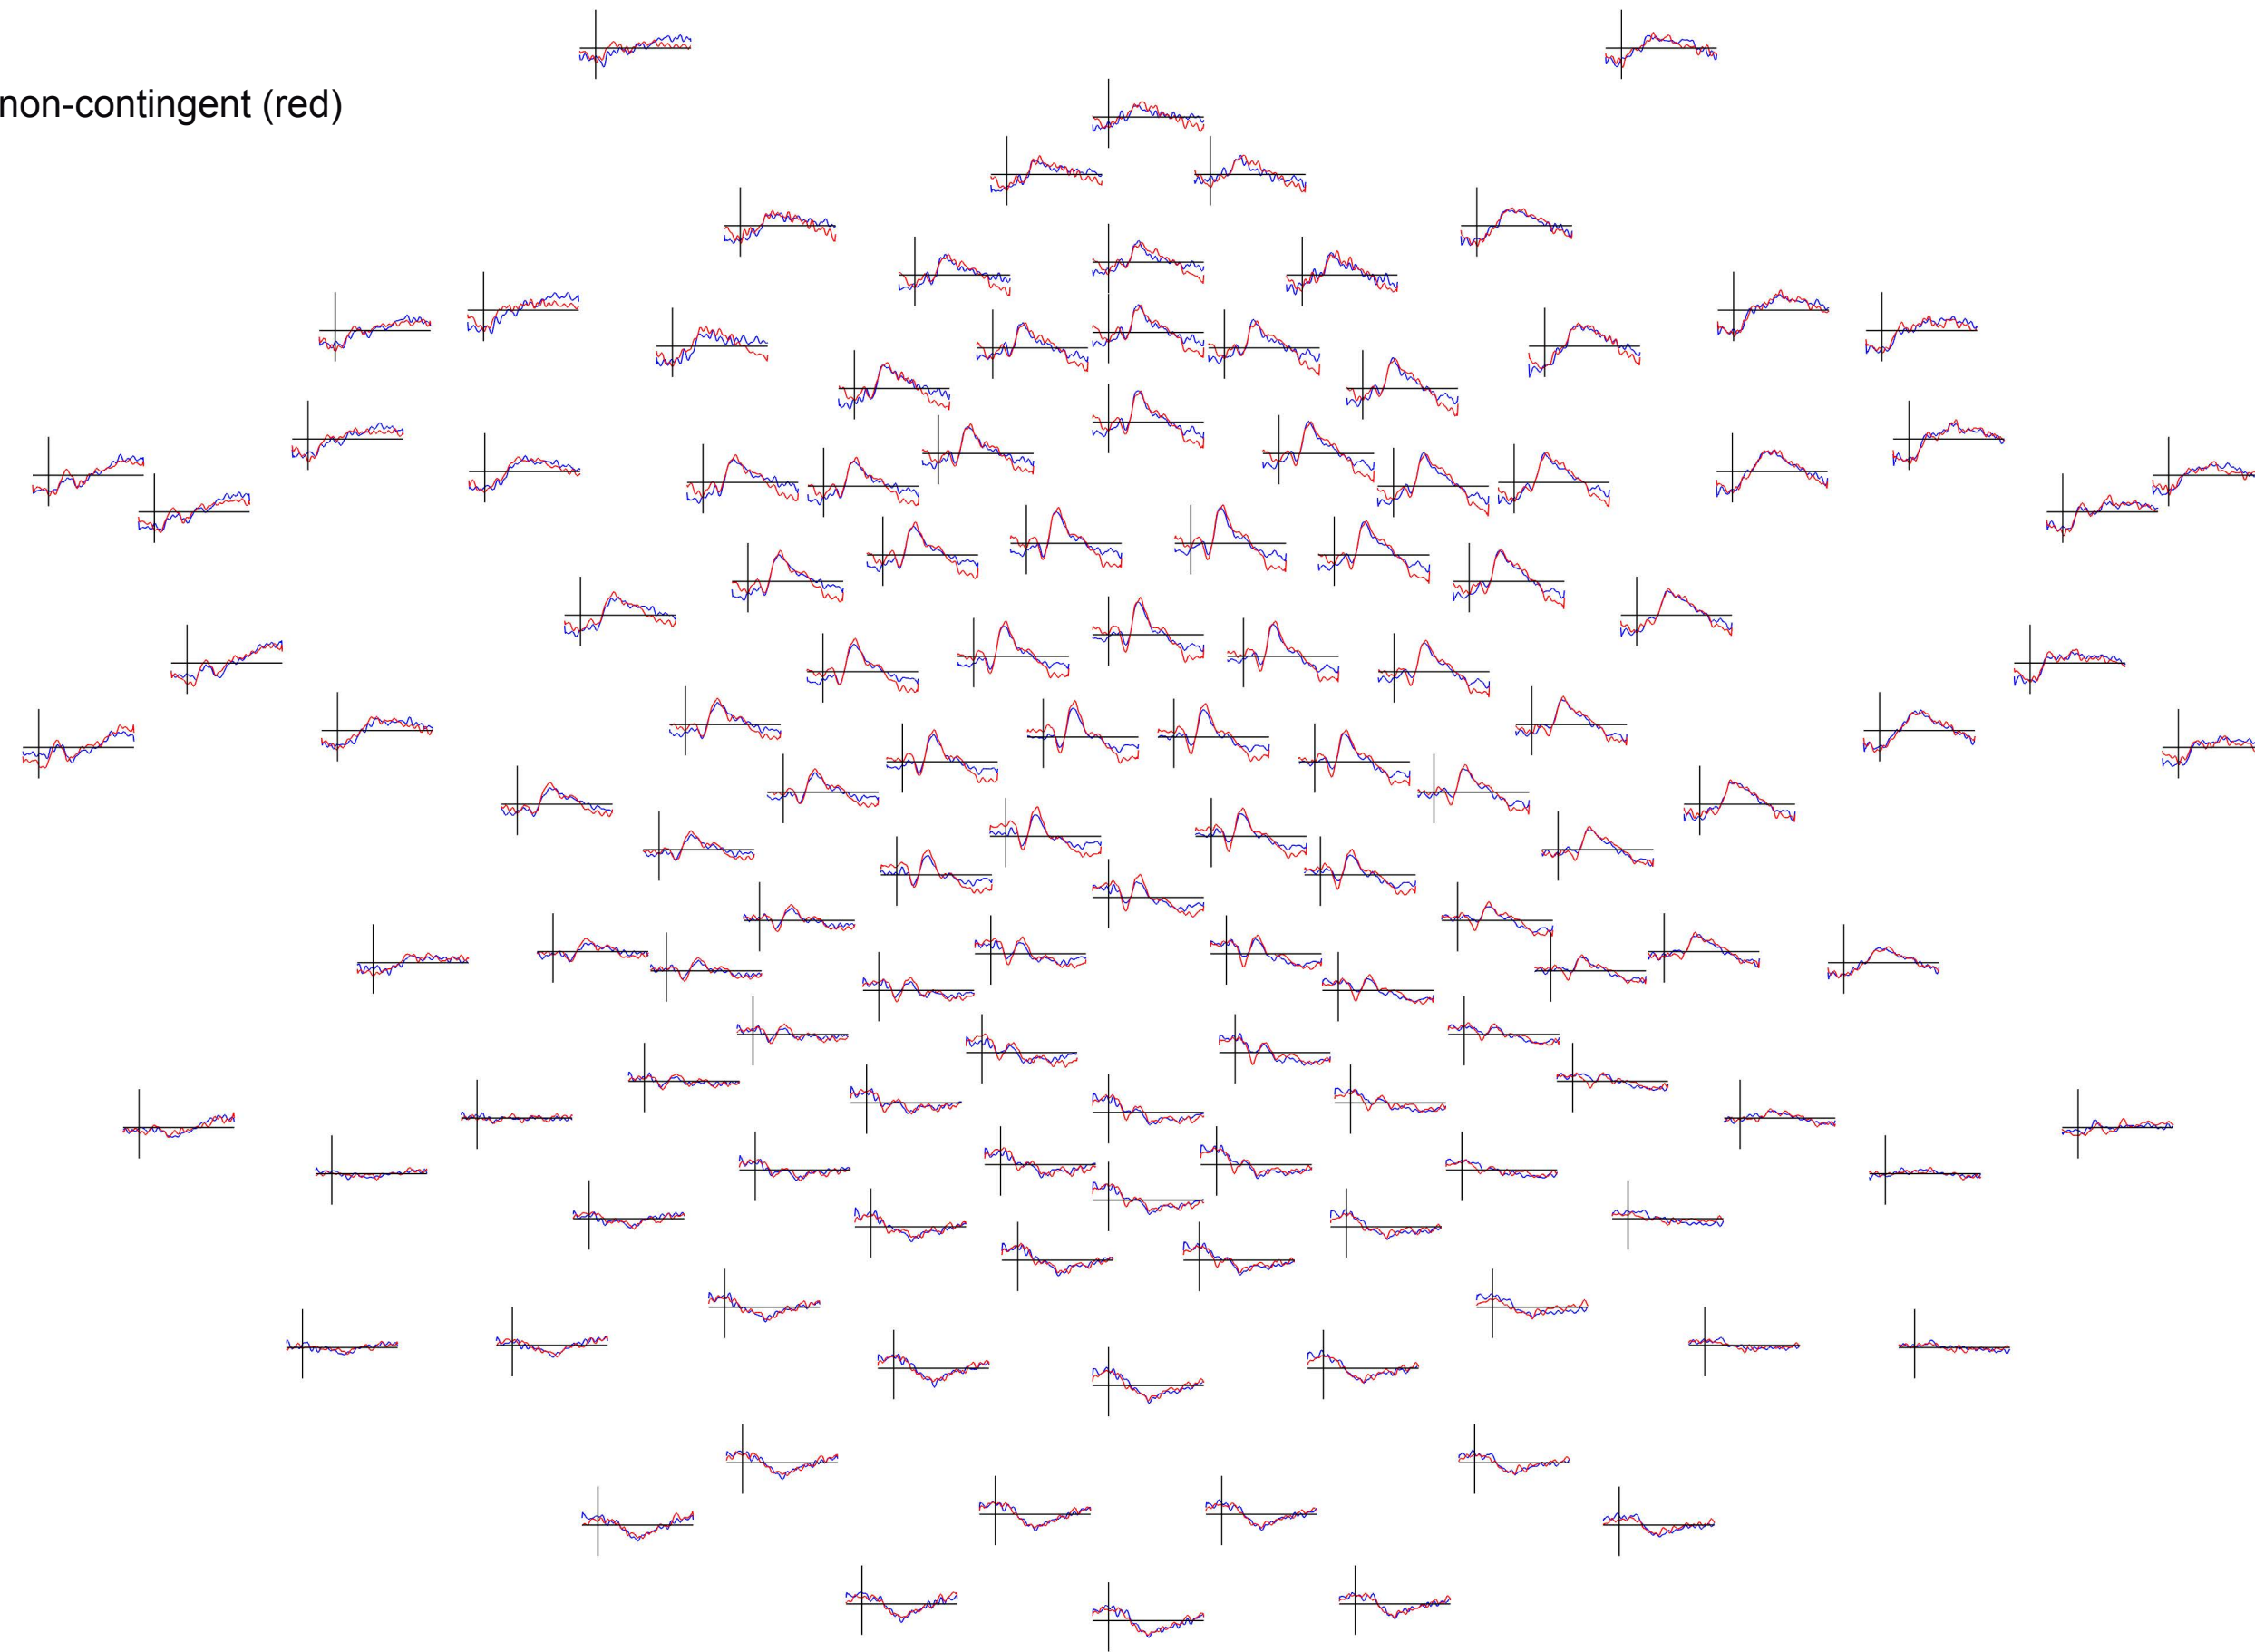

23-Dec-2020  
GA\_A\_AdCont\_MS\_ERP=b  
GA\_A\_AdNoCont\_MS\_ERP=r  
xlim=[-0.1 0.6]  
ylim=[-1.53 1.9]

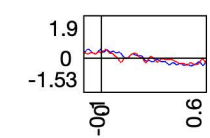

6 month olds: Infant contingent (blue) vs Infant non-contingent (red)

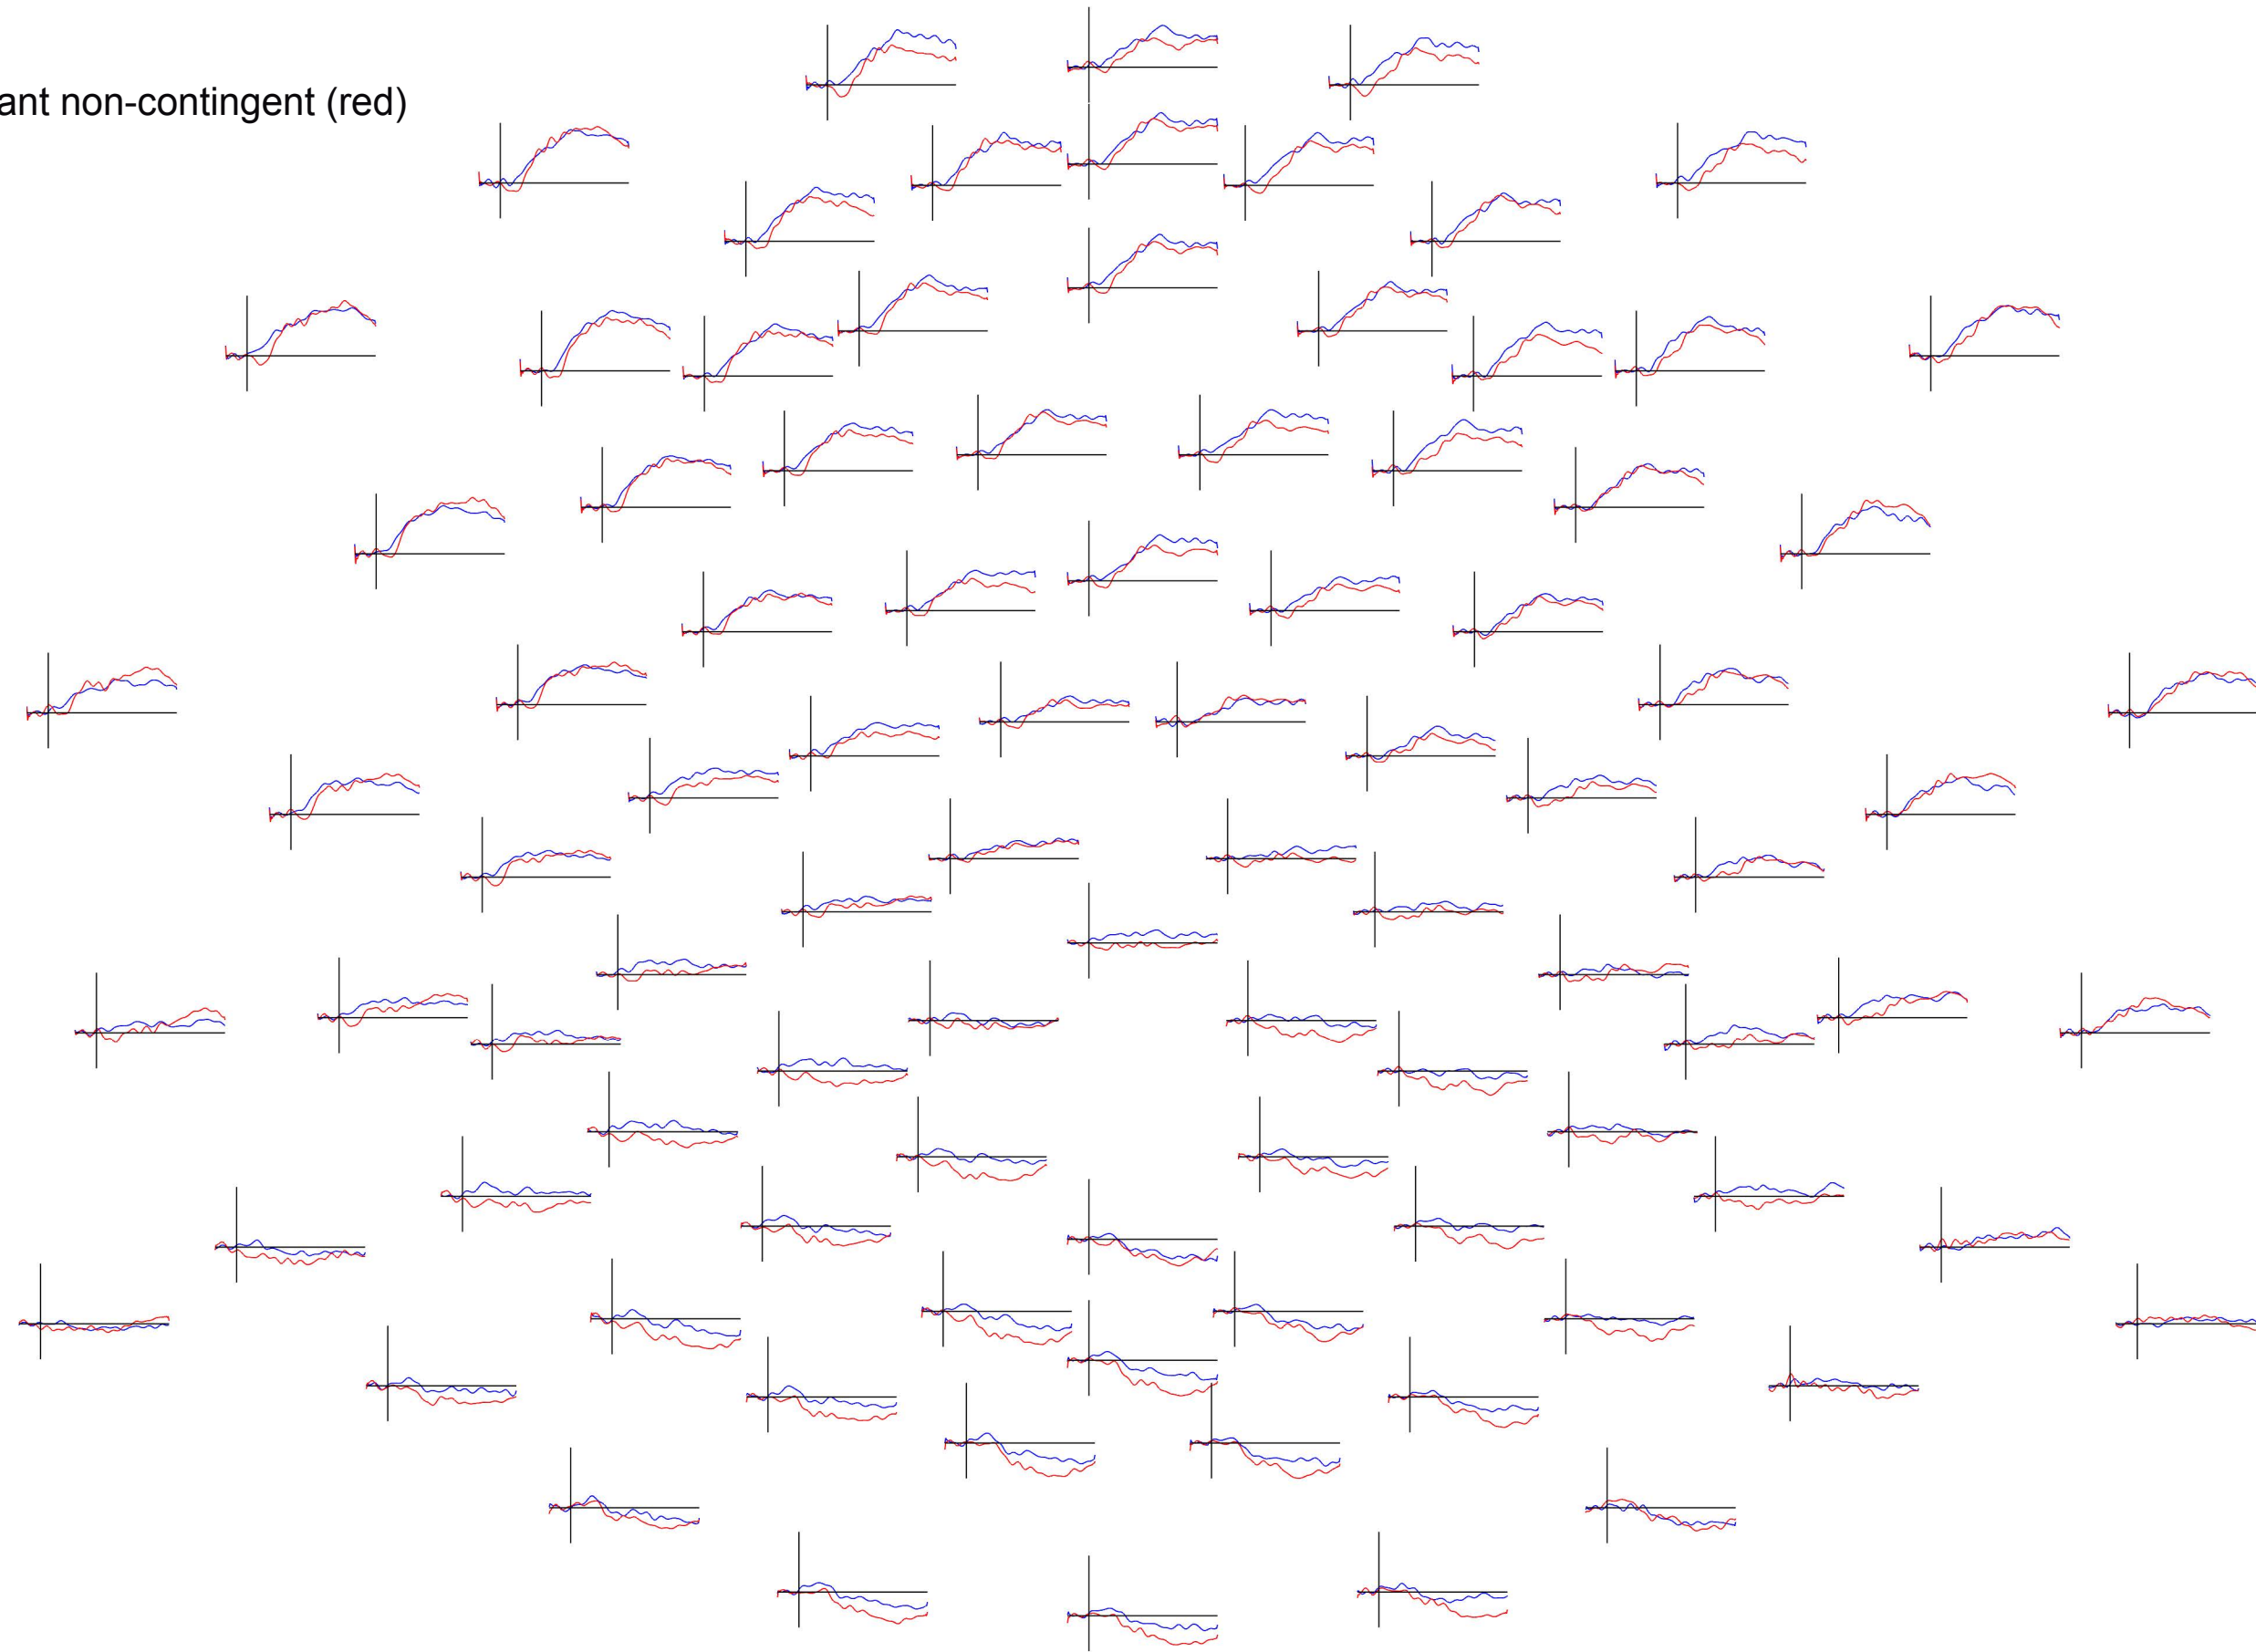

23-Dec-2020  
GA\_6\_InfCont\_MS\_ERP=b  
GA\_6\_InfNonCont\_MS\_ERP=r  
xlim=[-0.1 0.6]  
ylim=[-5.95 10.1]

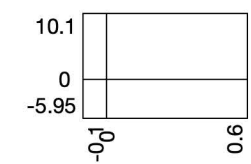

6 month olds: Adult contingent (blue) vs Adult non-contingent (red)

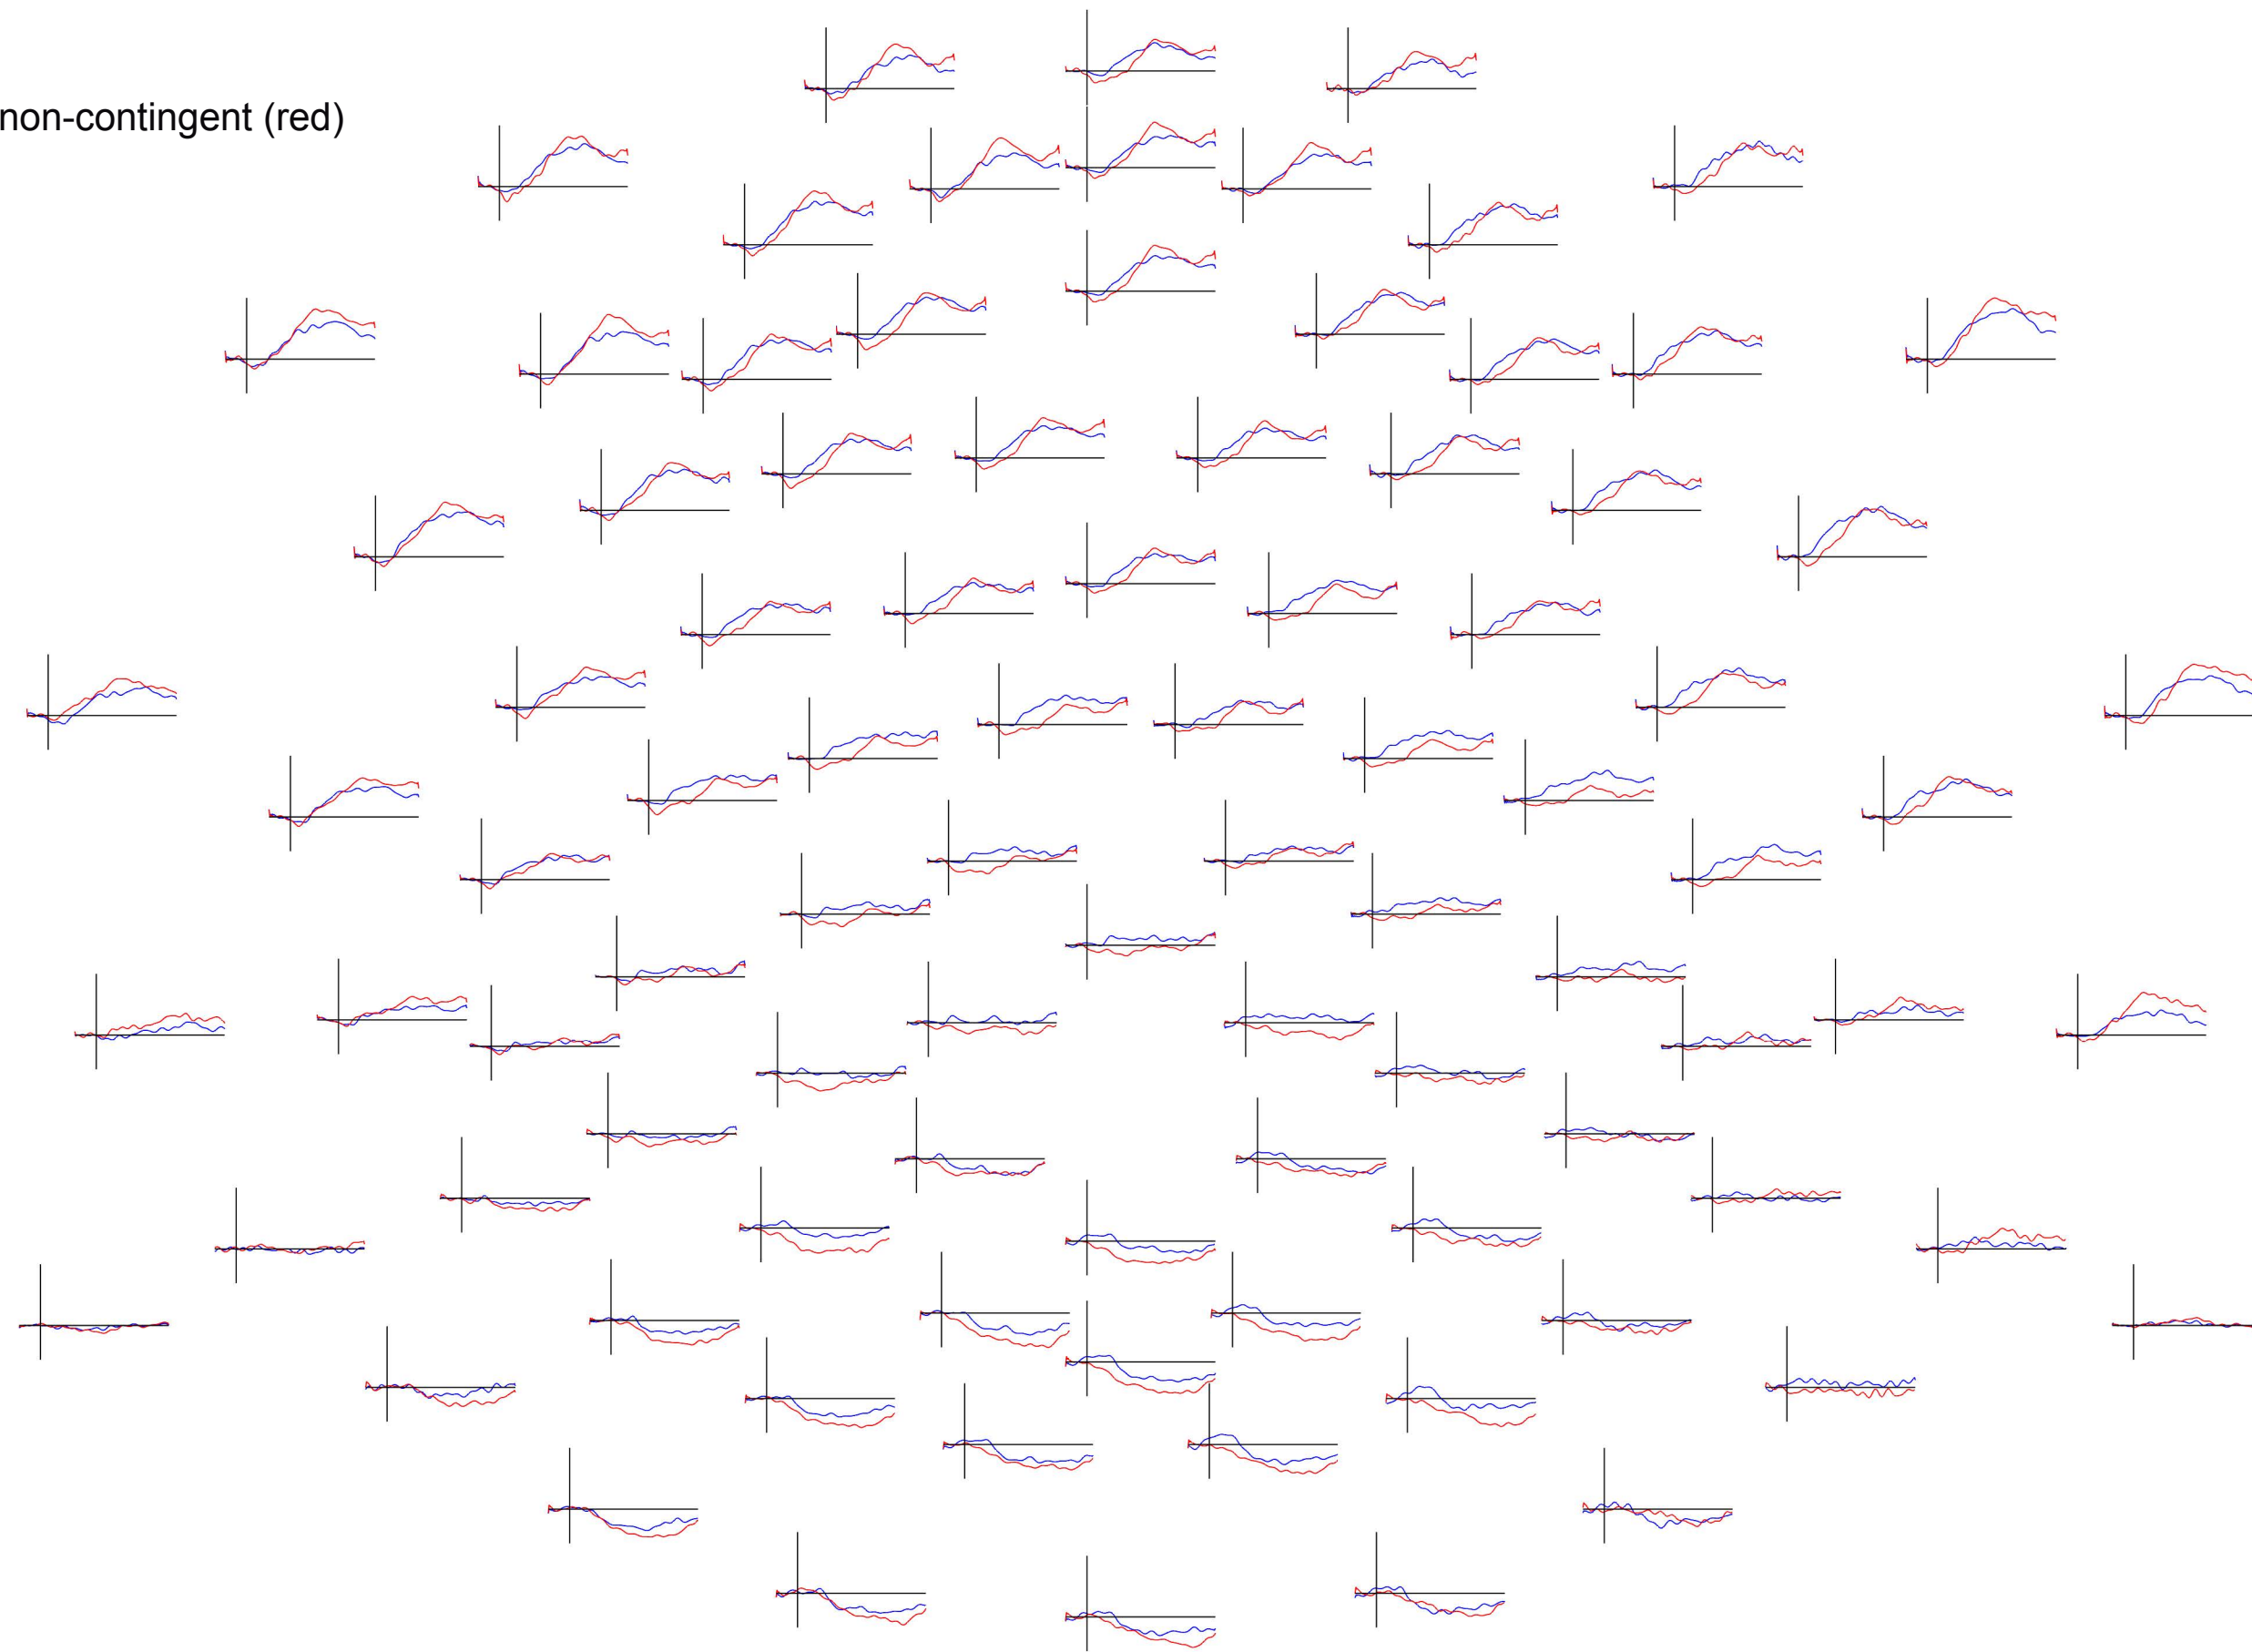

23-Dec-2020  
GA\_6\_AdCont\_MS\_ERP=b  
GA\_6\_AdNonCont\_MS\_ERP=r  
xlim=[-0.1 0.6]  
ylim=[-6.24 11.2]

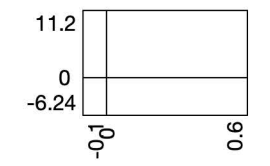

9 month olds: Infant contingent (blue) vs Infant non-contingent (red)

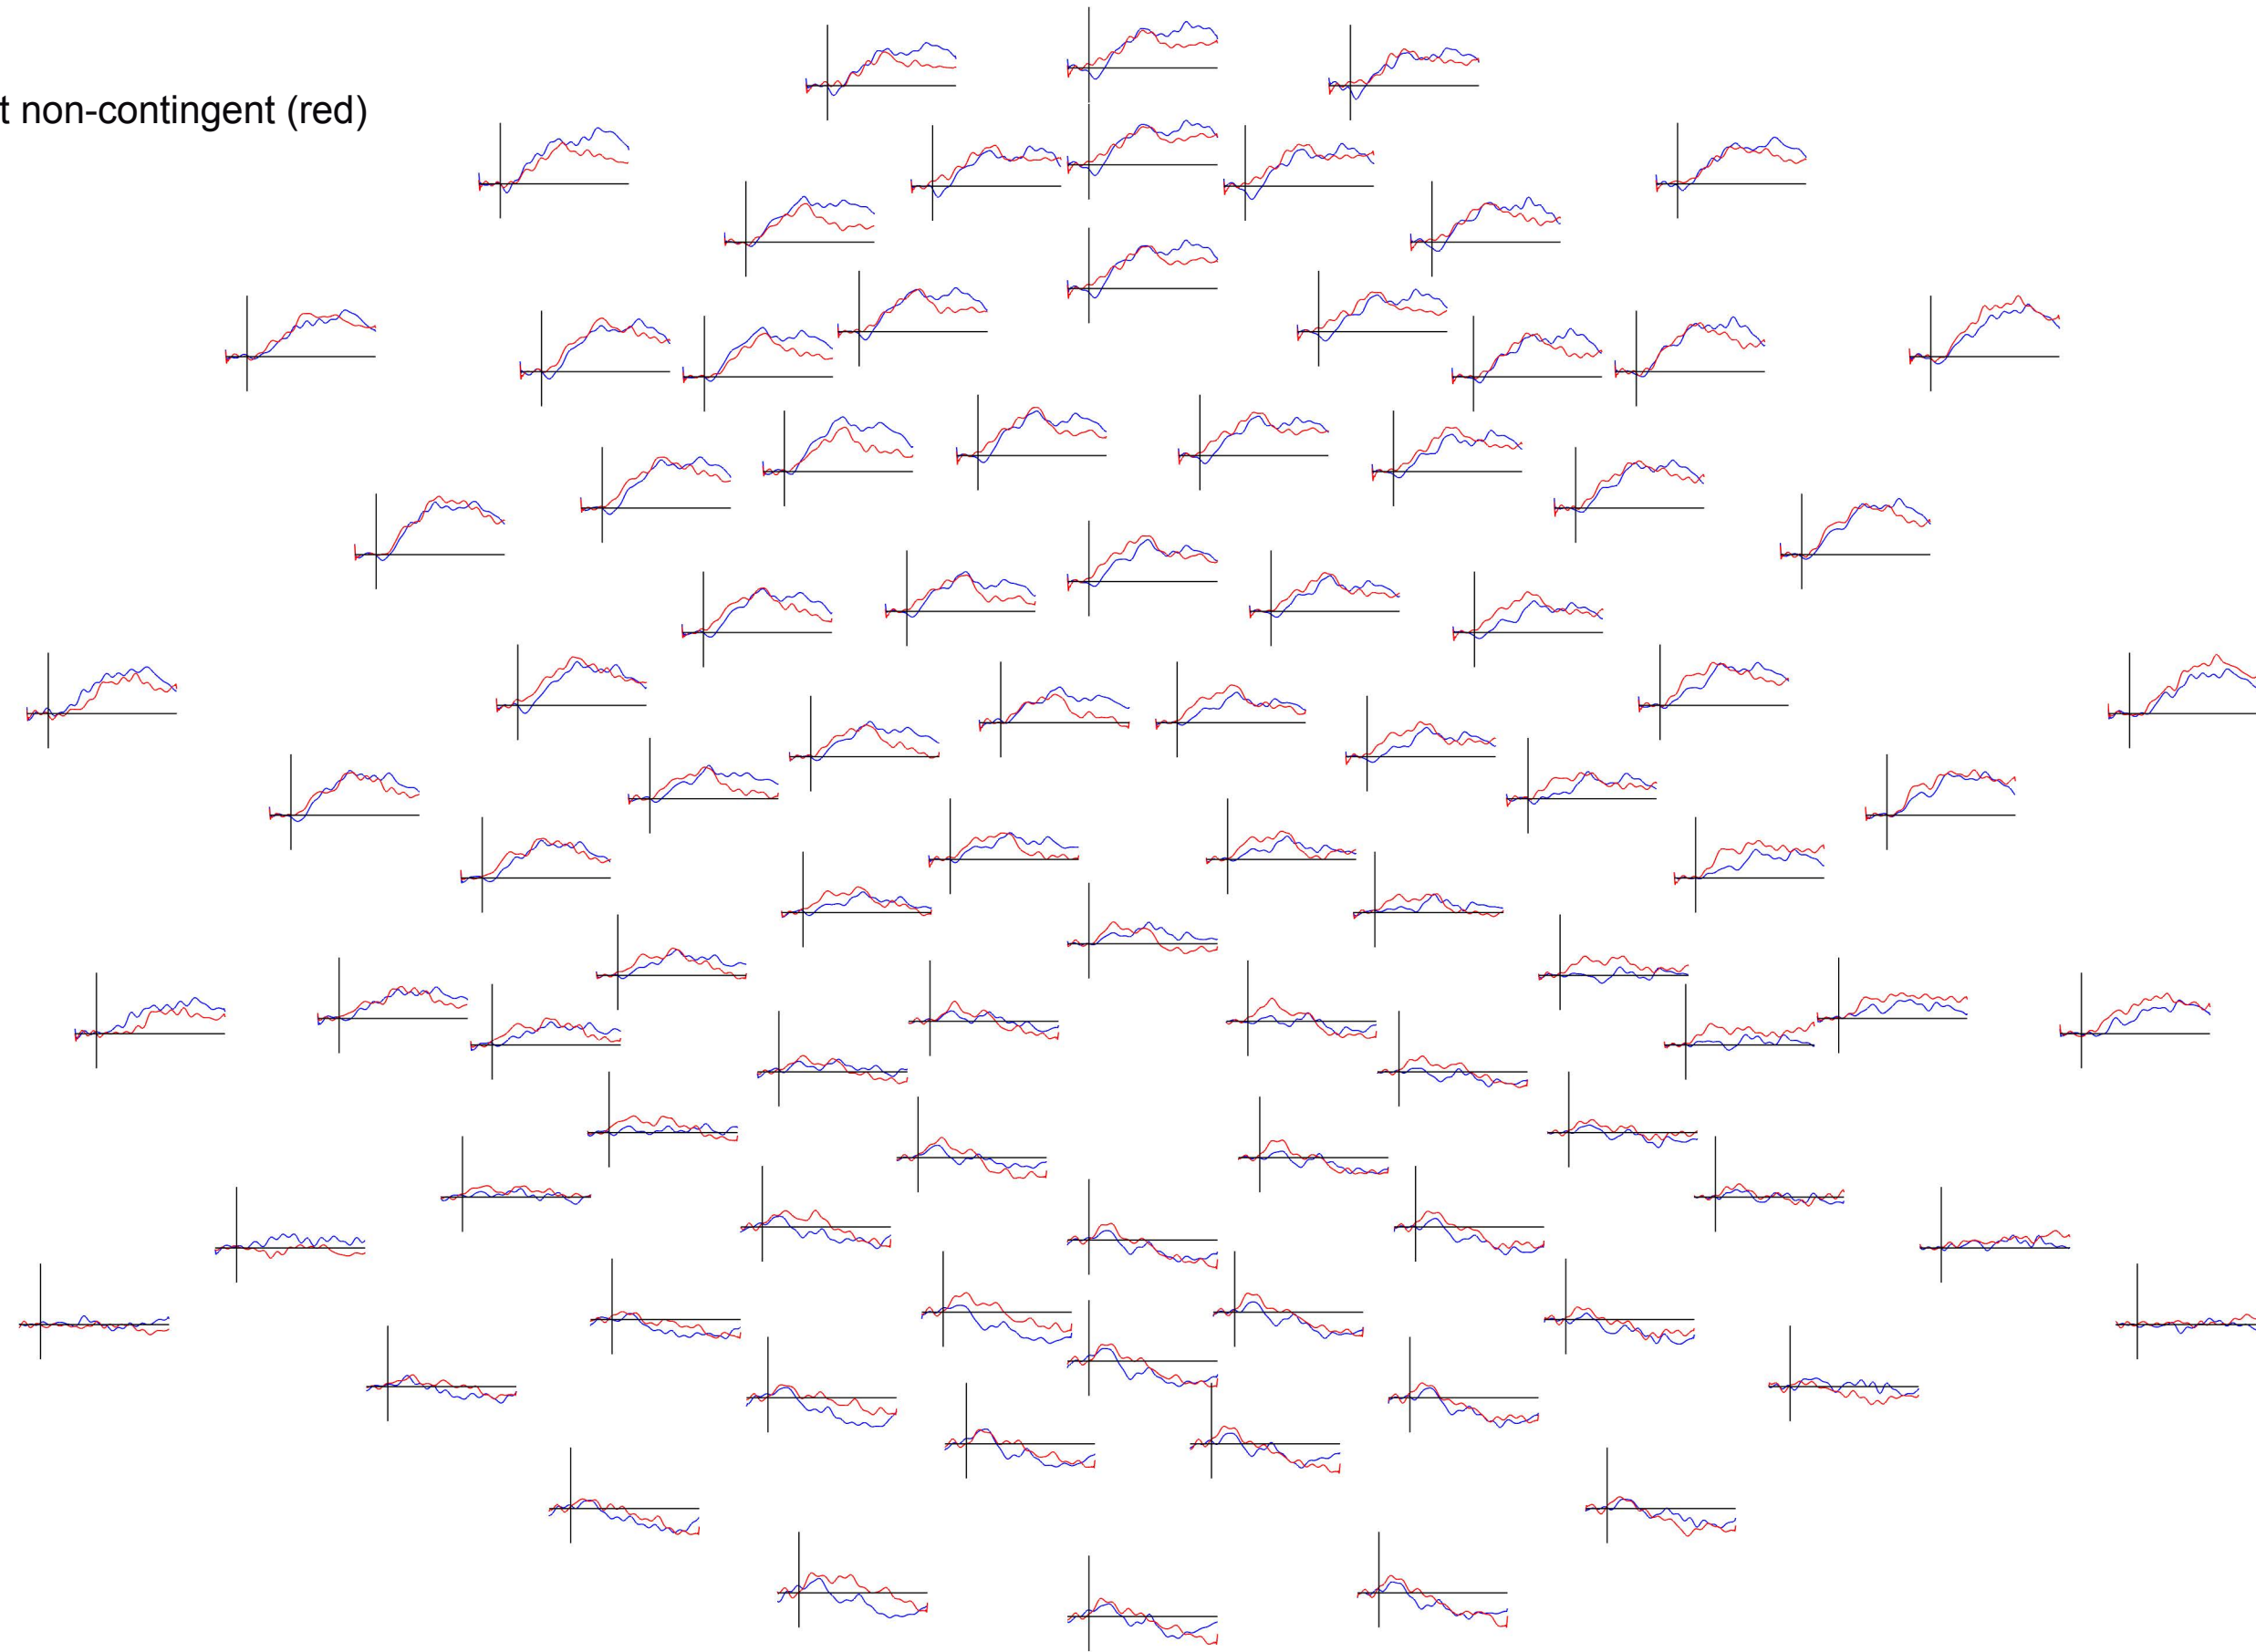

23-Dec-2020  
GA\_9\_InfCont\_MS\_ERP=b  
GA\_9\_InfNonCont\_MS\_ERP=r  
xlim=[-0.1 0.6]  
ylim=[-5.51 9.69]

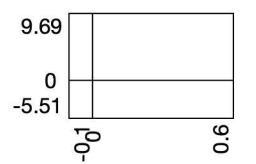

9 month olds: Adult contingent (blue) vs Adult non-contingent (red)

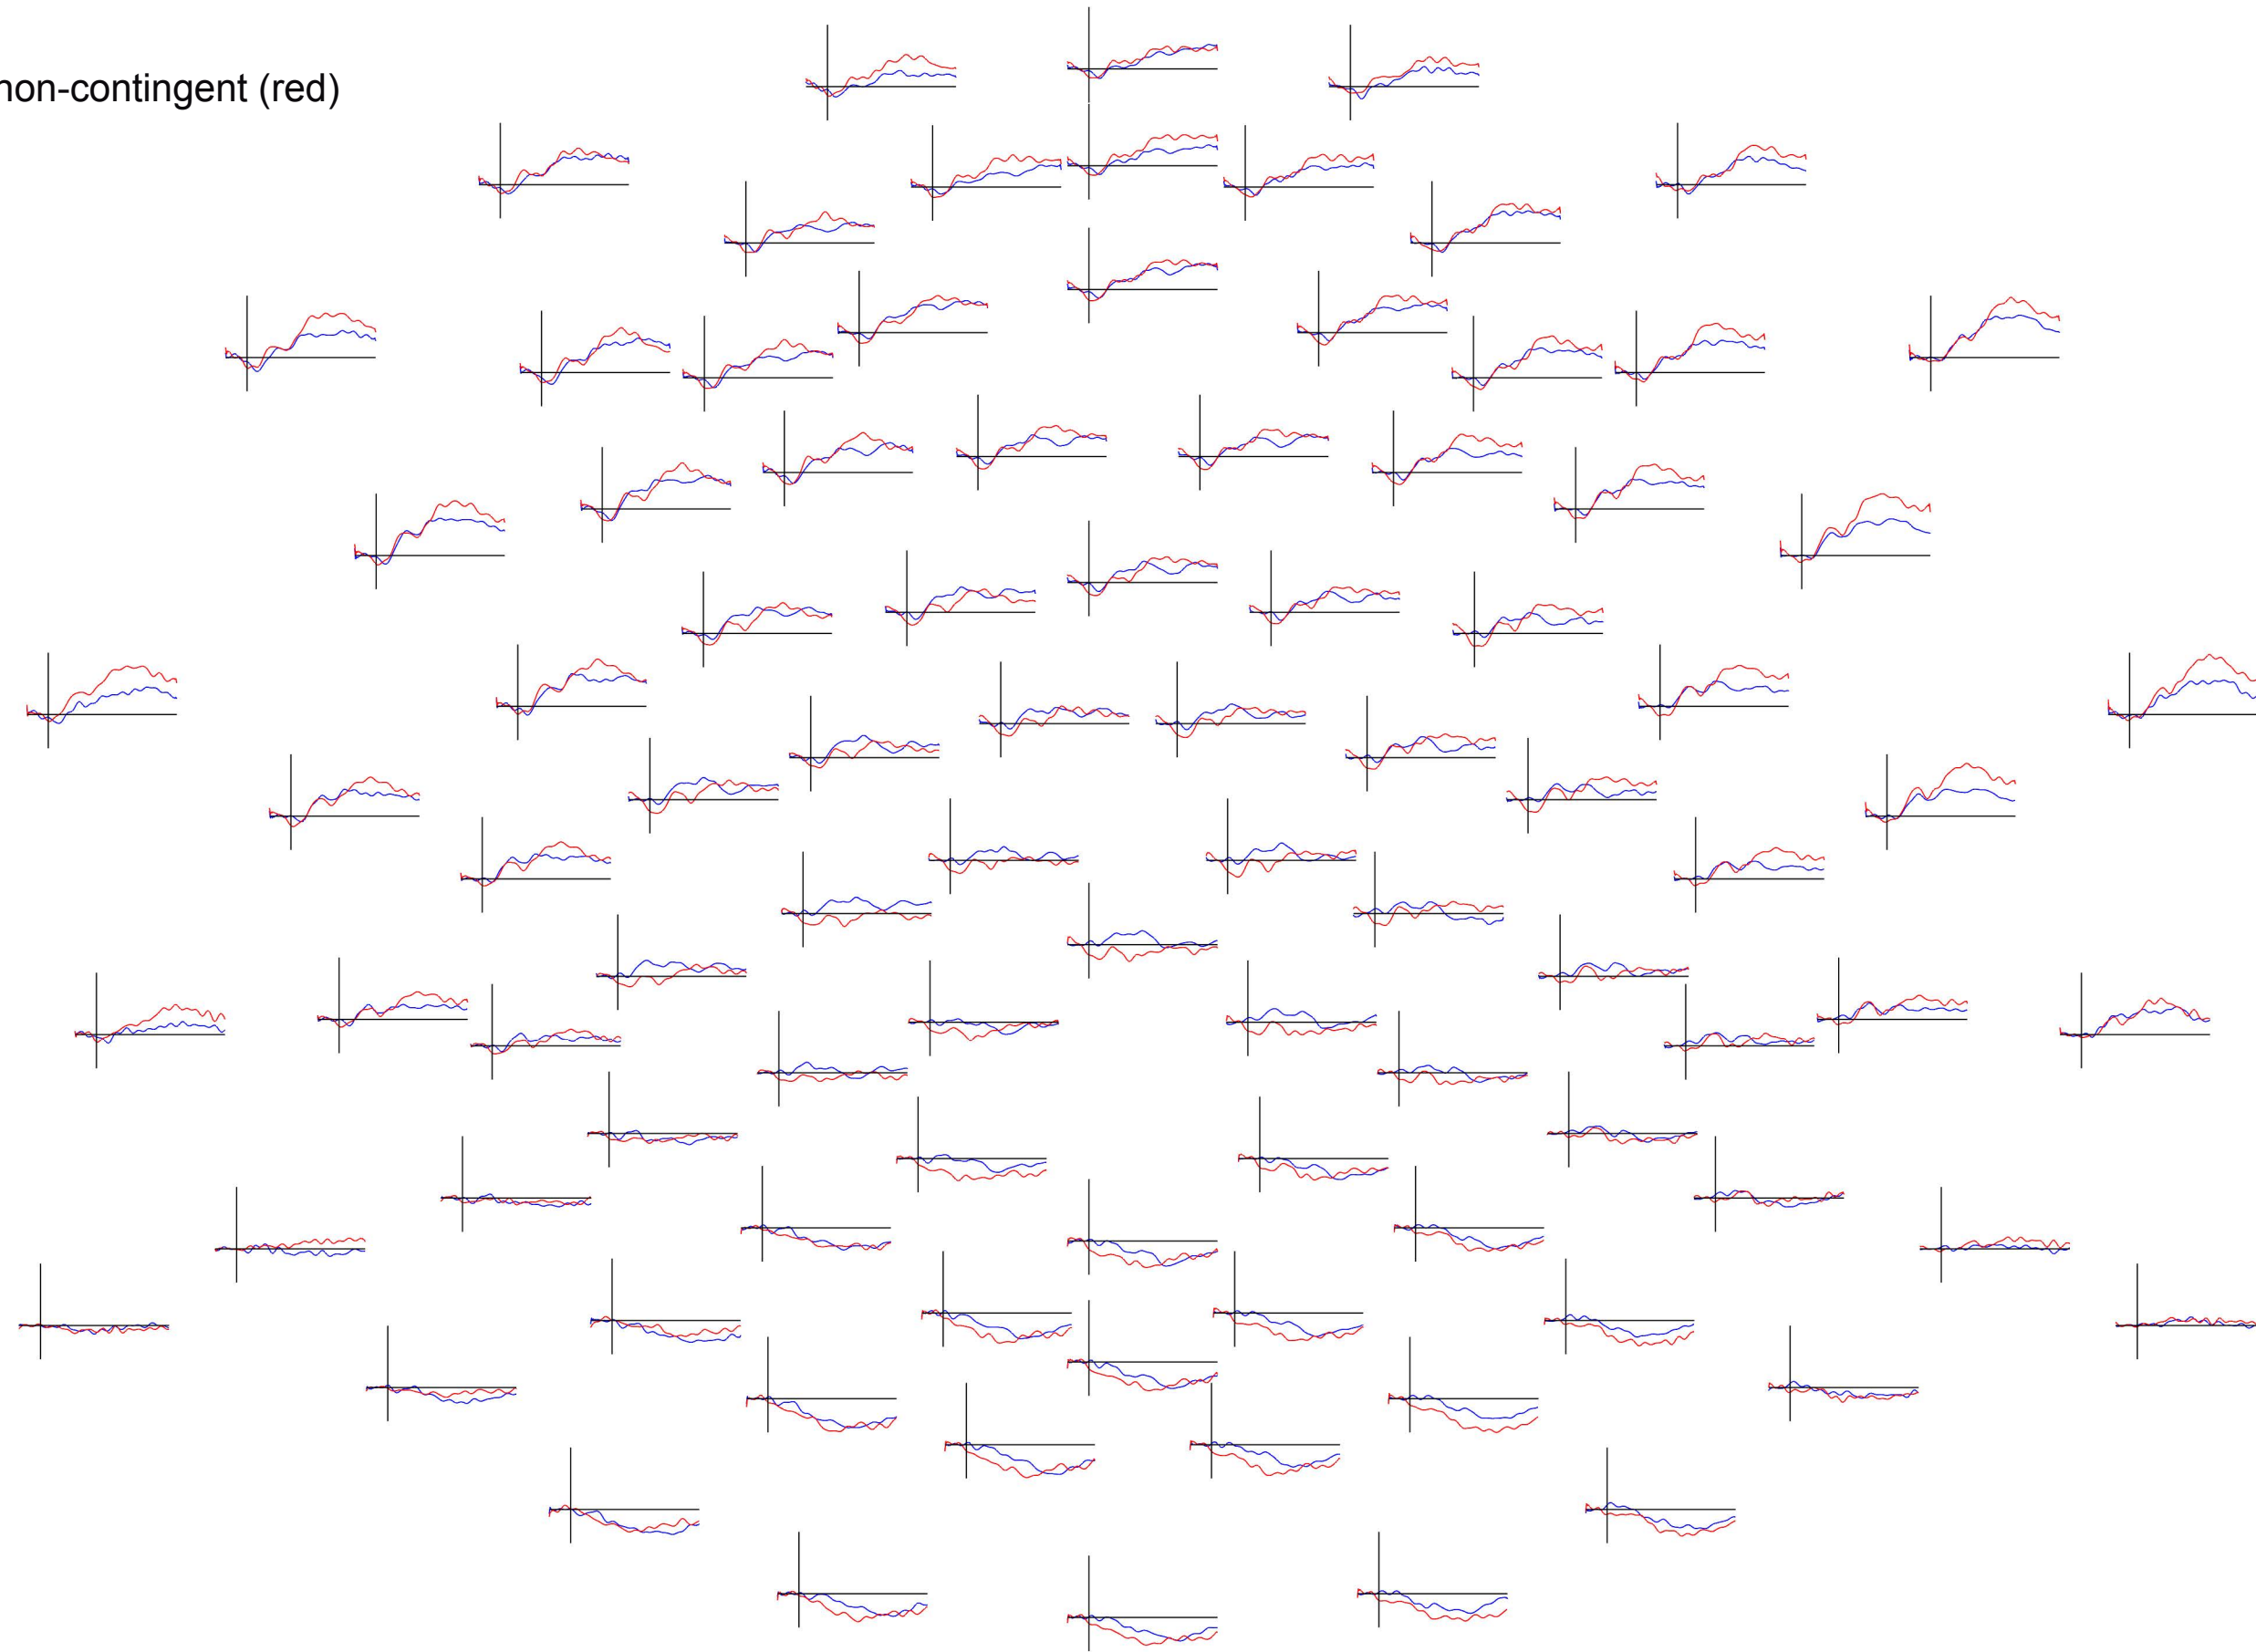

23-Dec-2020  
GA\_9\_AdCont\_MS\_ERP=b  
GA\_9\_AdNonCont\_MS\_ERP=r  
xlim=[-0.1 0.6]  
ylim=[-5.95 10.9]

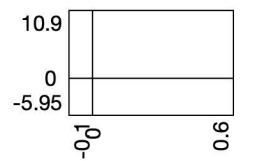

Supplement: mmc2.pdf [file mmc2.pdf]
